# Supplementary material
Source: publisher site journal article supplement (https://www.dovepress.com/article/343429)
Supplement: Supplementary file 1 [file get_supplementary_file.php]

**S1 Table**

Raw data (zone of inhibition in mm) for GBS Isolated from Pregnant Women and Their Newborns Non-susceptible to Penicillin and Vancomycin.

| **GBS isolates from pregnant women** | | **GBS isolates from newborns** | |
| --- | --- | --- | --- |
| **Isolates non-susceptible to penicillin (n=6)** | **Zone of inhibition**  **( mm)** | **Isolates non-susceptible to penicillin (n = 3)** | **Zone of inhibition (mm)** |
| Group B *Streptococcus* | 22 mm | Group B *Streptococcus* | 22 mm |
| Group B *Streptococcus* | 21 mm | Group B *Streptococcus* | 22 mm |
| Group B *Streptococcus* | 22 mm | Group B *Streptococcus* | 19 mm |
| Group B *Streptococcus* | 19 mm |  |  |
| Group B *Streptococcus* | 21 mm |  |  |
| Group B *Streptococcus* | 18 mm |  |  |
| **Isolates non-susceptible to vancomycin (n =2)** | **Zone of inhibition (mm)** | **Isolates non-susceptible to vancomycin (n =1)** | **Zone of inhibition ( mm)** |
| Group B *Streptococcus* | 10 mm | Group B *Streptococcus* | 11 mm |
| Group B *Streptococcus* | 13 mm |  |  |
